# Supplementary material
Source: publisher figshare collection journal article supplement (https://acs.figshare.com/ndownloader/files/6842547)
Supplement: Supplementary file 1 [file 6842547]

Supporting information for

**Fabrication of Two-dimensional Arrays of Diameter-tunable  
PS-b-P2VP Nanowires at the Air/Water Interface**

Xingjuan Zhao,<sup>†</sup> Xiaoli Yu,<sup>†</sup> Yong-Ill Lee,<sup>‡</sup> and Hong-Guo Liu<sup>\*†</sup>

<sup>†</sup> *Key Laboratory for Colloid and Interface Chemistry of Education Ministry, Shandong University, Jinan 250100, P. R. China. Email: hgliu@sdu.edu.cn*

<sup>‡</sup> *Anastro Laboratory, Department of Chemistry, Changwon National University, Changwon 641-773, Korea.*

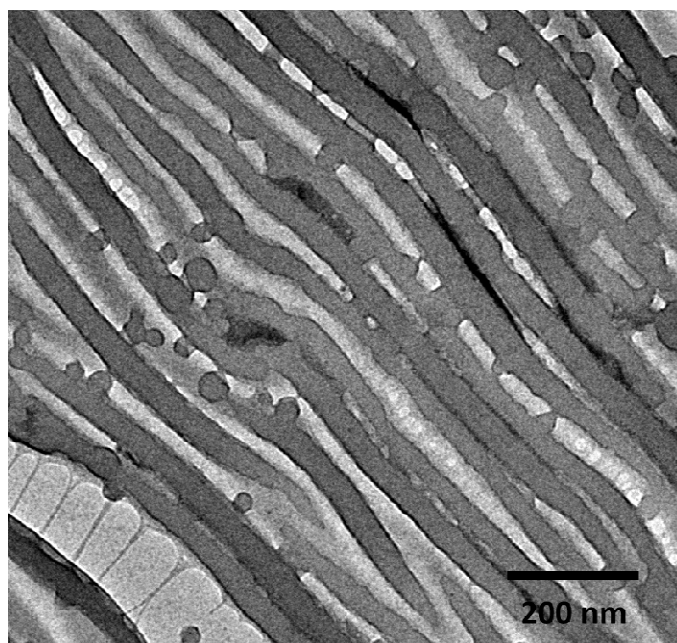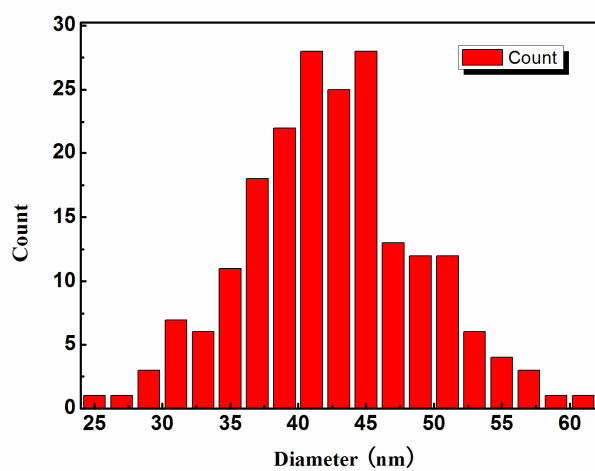

**Figure S1.** TEM image of the nanowires of pure PS-b-P2VP formed at the air/liquid interface and the diameter distribution histogram of the nanowires.

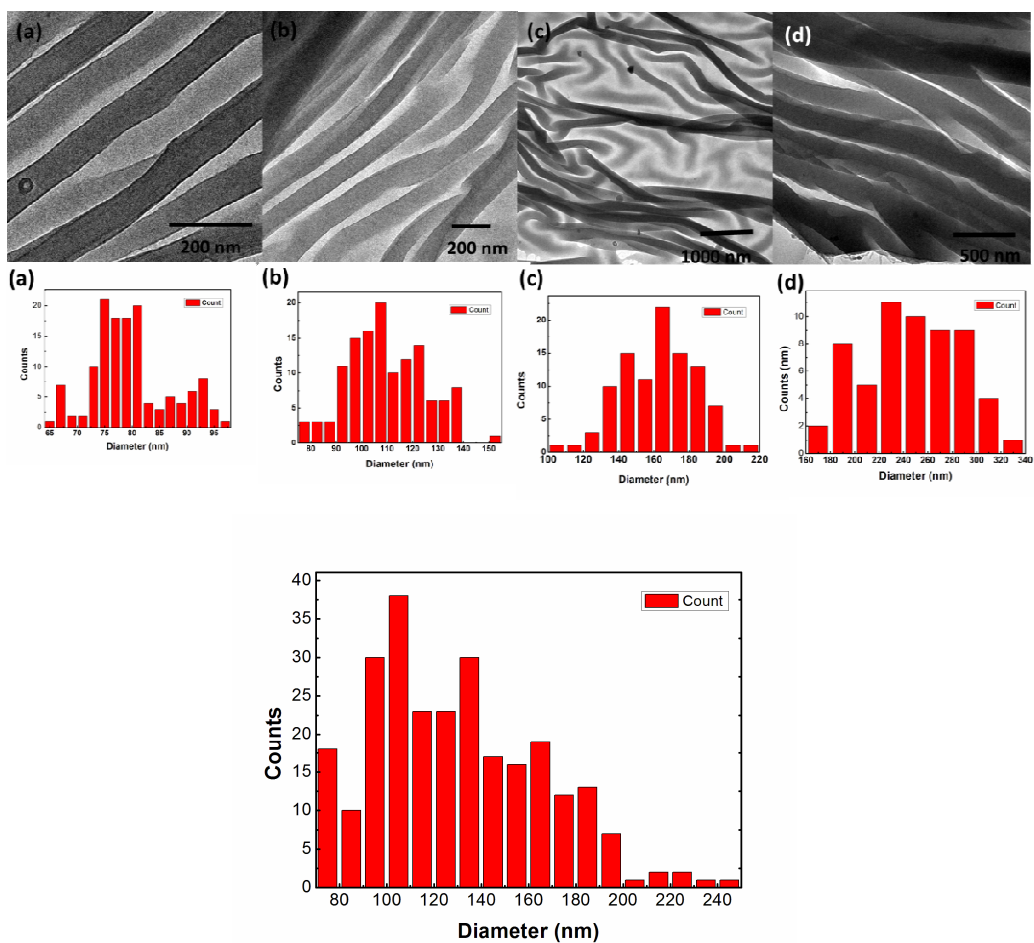

**Figure S2.** TEM images of the mixed h-PS1/PS-b-P2VP (mass ratio: 20) nanowires appeared at different areas, the corresponding diameter distribution histograms of the nanowires and the diameter distribution histogram of all the nanowires

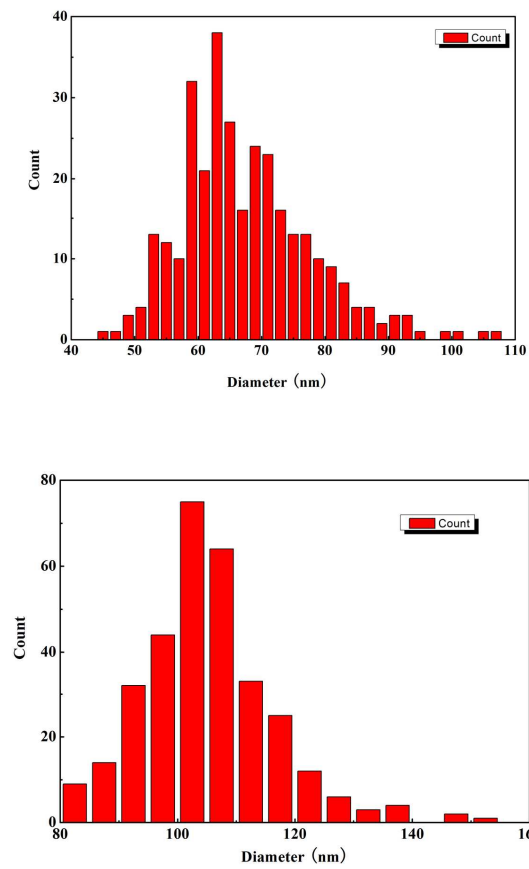

**Figure S3.** Diameter distribution histograms of the nanowires formed at the air/water interface. Top: h-PS1/PS-b-P2VP = 4; Bottom: h-PS1/PS-b-P2VP = 12.

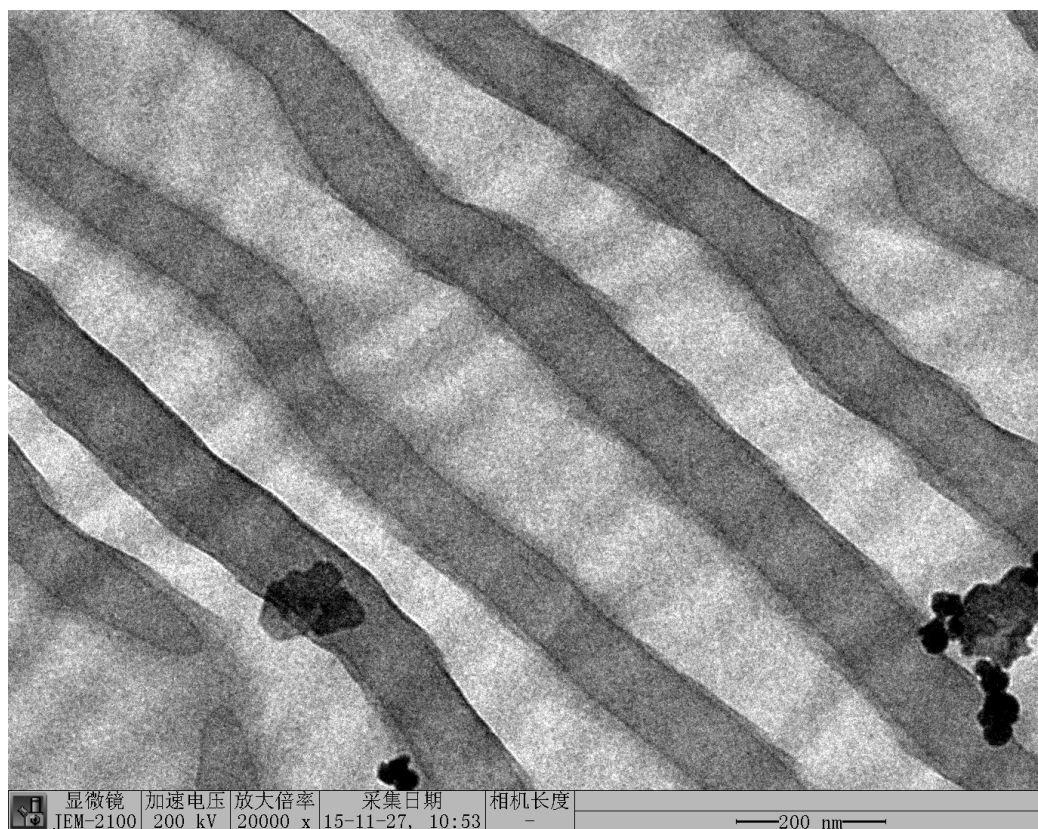

**Figure S4.** TEM image of the mixed h-PS2/PS-b-P2VP (mass ratio: 20) nanowires formed at the air/liquid interface.

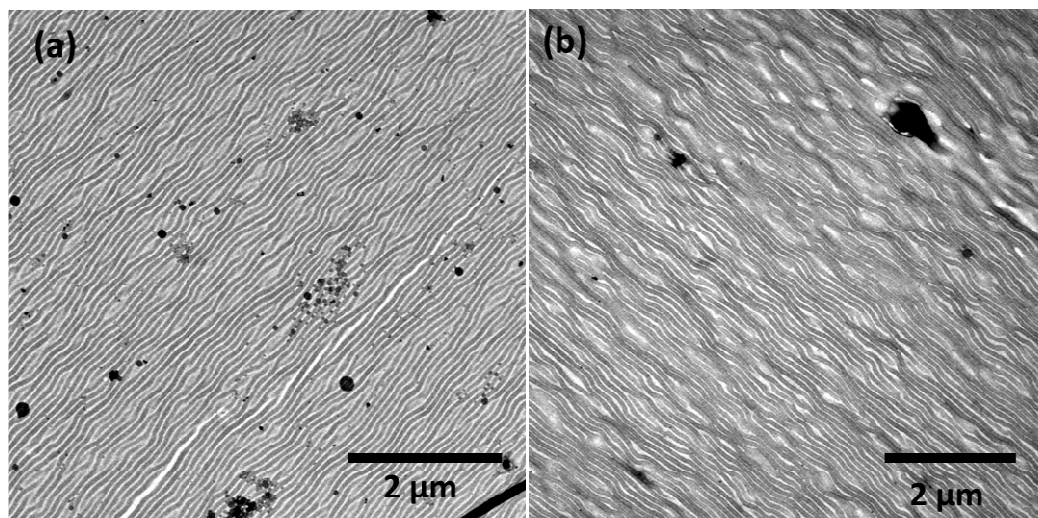

**Figure S5.** TEM images of the nanowires formed at the air/liquid interface. (a), Pure PS-b-P2VP; (b), h-PS1/PS-b-P2VP with the mass ratio of 4.

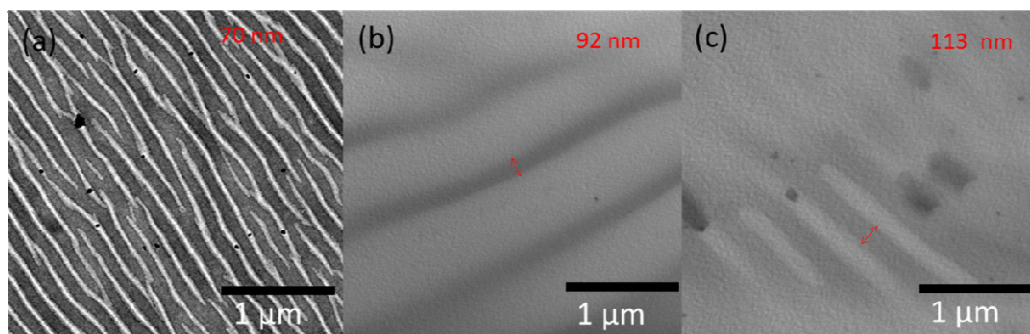

**Figure S6.** TEM micrographs of thin films of PS-b-P2VP [ $M_n(\text{PS}) = 440000 \text{ g mol}^{-1}$ ;  $M_n(\text{P2VP}) = 12500 \text{ g mol}^{-1}$ ;  $M_w/M_n = 1.2$ ] formed at the air/water interface via encapsulation of h-PS1 with different mass ratios of h-PS1/PS-b-P2VP: 0 (a), 2 (b), and 4 (c).

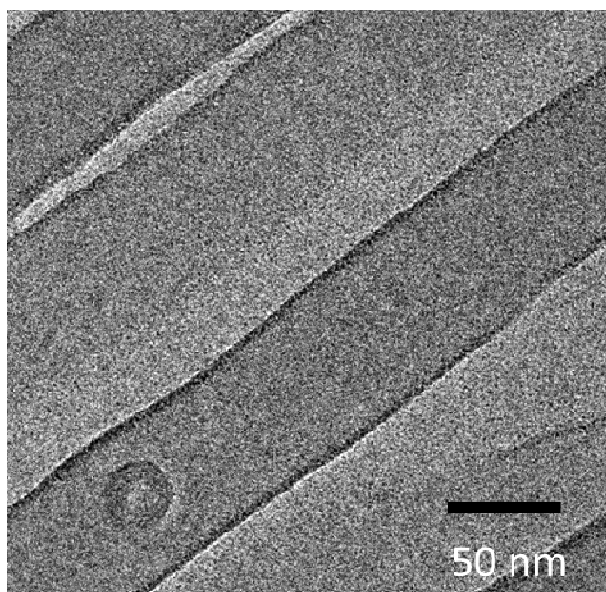

**Figure S7.** A high magnification TEM micrograph of the thin film formed at the air/water interface via encapsulation of h-PS1 with the mass ratio of 6.



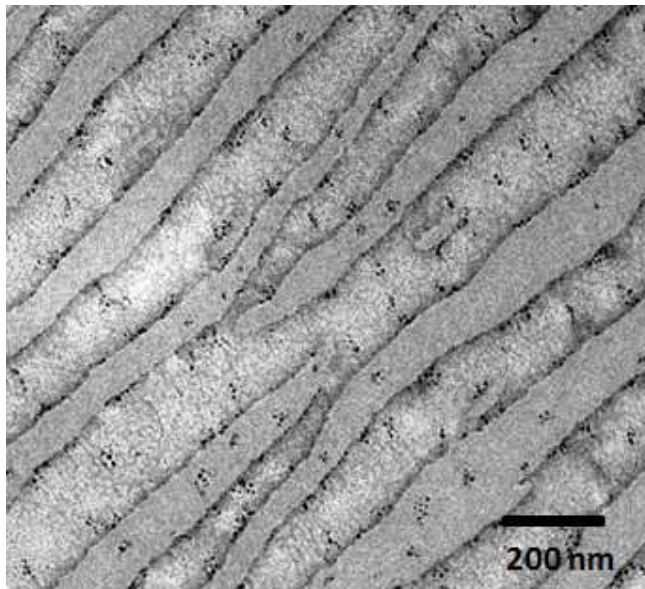

**Figure S8.** TEM image of the PS-*b*-P2VP/Pb<sup>2+</sup> nanowires formed at the air/liquid interface. The concentration of the block copolymer is 0.2 mg mL<sup>-1</sup>, the volume ratio of the DMF/chloroform is 6:4, the concentration of the lead acetate is 2×10<sup>-3</sup> mol L<sup>-1</sup>, and volumes of the mixed organic solution of the polymer and the aqueous solution of Pb<sup>2+</sup> are 5 mL, respectively.

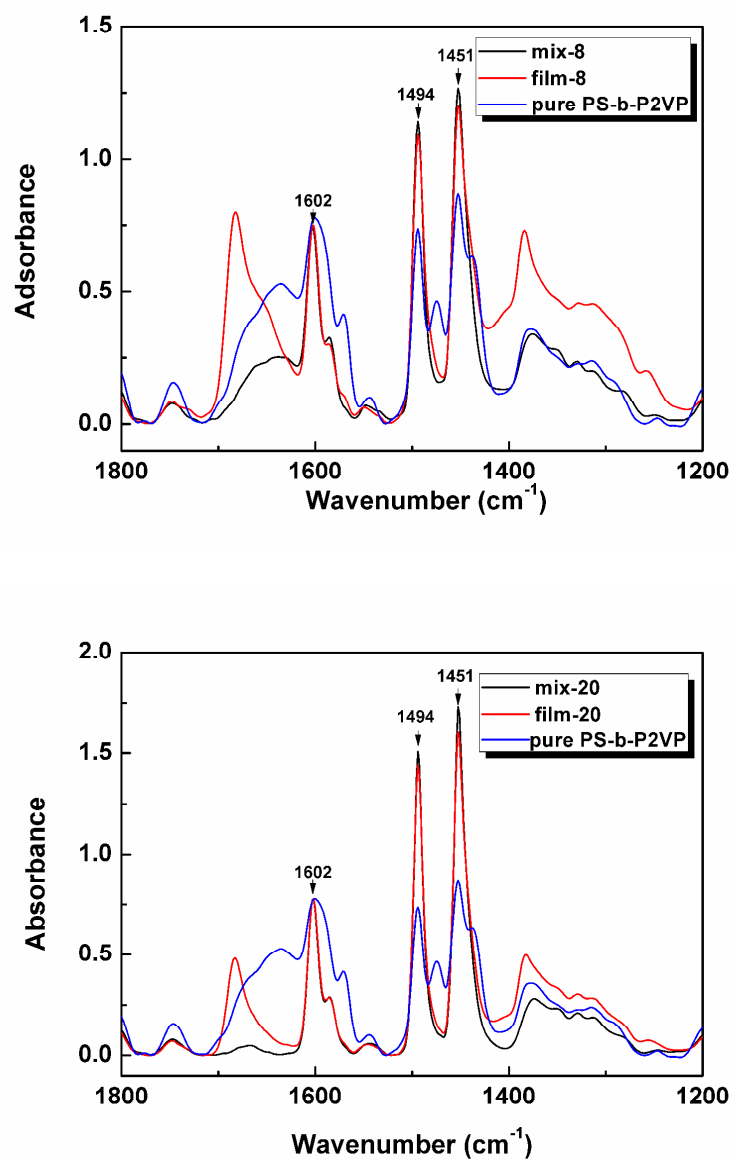

**Figure S9.** FTIR spectra of the pure block copolymer, the composite films of h-PS1/PS-b-P2VP formed at the air/water interface with different mass ratios (8 and 20) and the corresponding physical mixtures of h-PS1/PS-b-P2VP.



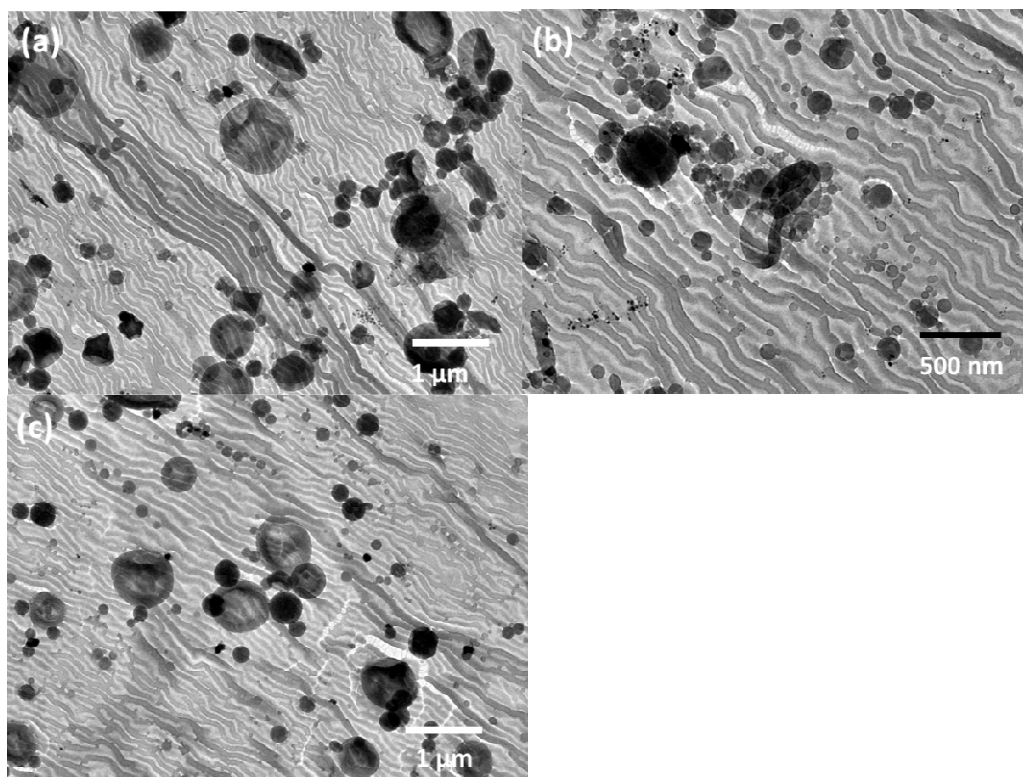

**Figure S10.** TEM micrographs of the mixed films of h-PS3/PS-b-P2VP with the mass ratios of 1 (a,b) and 2 (c). It can be seen that a large amount of solid spheres appeared in the images.

Table S1. Mean diameters and the diameter distributions of the nanowires of PS-b-P2VP and the mixed h-PS1/PS-b-P2VP systems with different mass ratios.

| Mass Ratio (h-PS1/PS-b-P2VP) | Diameter (nm) | $\sigma$ (nm) |
|------------------------------|---------------|---------------|
| 0                            | 42            | 5             |
| 1                            | 53            | 4             |
| 2                            | 63            | 5             |
| 4                            | 70            | 5             |
| 6                            | 88            | 7             |
| 8                            | 97            | 9             |
| 12                           | 107           | 24            |
| 20                           | 147           | 77            |

Table S2. Mean diameters and the diameter distributions of the nanowires of PS-b-P2VP and the mixed h-PS2/PS-b-P2VP systems with different mass ratios.

| Mass Ratio (h-PS1/PS-b-P2VP) | Diameter (nm) | $\sigma$ (nm) |
|------------------------------|---------------|---------------|
| 0                            | 42            | 5             |
| 0.2                          | 44            | 4             |
| 1                            | 46            | 4             |
| 2                            | 54            | 4             |
| 3                            | 58            | 5             |
| 4                            | 68            | 6             |
| 5                            | 103           | 10            |
| 6                            | 105           | 12            |
| 8                            | 106           | 10            |
| 20                           | 104           | 13            |

Table S3. Mean diameters and the diameter distributions of the nanowires of PS-b-P2VP and the mixed h-PS3/PS-b-P2VP systems with different mass ratios.

| Mass Ratio (h-PS1/PS-b-P2VP) | Diameter (nm) | $\sigma$ (nm) |
|------------------------------|---------------|---------------|
| 0                            | 42            | 5             |
| 1                            | 70            | 7             |
| 2                            | 65            | 5             |
| 4                            | 68            | 8             |
| 20                           | 71            | 8             |

**Measurement and calculation of the thin film amount:** The mass of the film formed at the air/liquid interface was measured using a balance (Sartorius, BS 124S). Firstly, 20 mg of PS-b-P2VP and 160 mg of h-PS1 were dissolved in 40 mL chloroform in a 100 mL volumetric flask. Then DMF was added to the mark. This mixed organic solution was used as organic phase to form the liquid/liquid interface. Sixteen glass bottles with the inner diameter of 3.5 cm were used to prepare the thin film. 5 mL of the mixed organic solution was added to a bottle, and then 5 mL aqueous solution of AgNO<sub>3</sub> with a concentration of 0.01 mol L<sup>-1</sup> was added carefully to cover the organic phase. A planar liquid/liquid interface was constructed. A thin film appeared at the air/aqueous solution interface quickly. This film was a free-standing one and deposited on a glass slide after 8 hours. All the films formed at the air/liquid interface by using the 16 glass bottle were selected and dried in a desiccator with P<sub>2</sub>O<sub>5</sub> as drying agent. The sample was measured using a balance after 2 days. The mass of the film was found to be 12.2 mg.

The total area of the air/liquid interface can be calculated.  $A = 3.14 \times 3.5^2 \times 16 = 615.44$  cm<sup>2</sup>. Then the mass of the film per cm<sup>2</sup> should be 0.0198 mg, i.e. 19.8 µg.

In order to get these films,  $(20 + 160) \times 80/100 = 145$  mg. So the yield can be calculated to be:  $12.2/145 = 0.084 = 8.4\%$ . Please note that the actual yield should be less than this value slightly due to the existence of the silver species in the films.

If the formed film is a monolayer composed of parallel aligned close-packed nanowires, the mass can be calculated. For the composite nanowires of the h-PS1/PS-b-P2VP with the mass ratio of 8, the mean diameter of the nanowires was measured to be 107 nm. Then the volume of the film can be calculated as follows:

$$V = 615.44 \times 107 \times 10^{-7} \times (3.14/4) = 5.17 \times 10^{-3} \text{ cm}^3.$$

If just consider the PS (PS block and h-PS1), the density of the PS is 1.05 g cm<sup>-3</sup>. Then the mass can be calculated as:  $M = 1.05 \times 5.17 \times 10^{-3} = 5.43 \times 10^{-3} \text{ g} = 5.43 \text{ mg}$

So the mass per cm<sup>2</sup> is  $5.43/615.44 = 0.0088$  mg, i.e. 8.8 µg.

It can be seen that the calculated 8.8 µg cm<sup>-2</sup> is less than the measured value, 19.8 µg cm<sup>-2</sup>. The difference should be attributed to the combined Ag<sup>+</sup> ions and the formed Ag nanoparticles. It can be also seen that the formed thin film can be considered as a monolayer. The yield should be dependent on the area of the air/liquid interface.
